# Supplementary material for: Effect of radical copolymerization of the (oxa)norbornene end-group of RAFT-prepared macromonomers on bottlebrush copolymer synthesis via ROMP
Source: Royal Society of Chemistry journal article supplement (doi:10.1039/d1py01599k), 2022-01-01
Supplement: d1py01599k1.pdf [file d1py01599k1.pdf]

## Supporting Information

### Effect of Radical Copolymerization of the (Oxa)norbornene End-group of RAFT-prepared Macromonomers on Bottlebrush Copolymer Synthesis via ROMP

Mohamed Naguib,<sup>a,b</sup> Kate L. Nixon,<sup>a,c</sup> and Daniel J. Keddie\*<sup>a</sup>

<sup>a</sup>School of Sciences, Faculty of Science and Engineering, University of Wolverhampton, Wulfruna Street, Wolverhampton, WV1 1LY, United Kingdom, <sup>b</sup>Polymer and Pigments Department, National Research Centre, Cairo, 12622, Egypt., <sup>c</sup>School of Life, Health and Chemical Sciences, The Open University, Walton Hall, Milton Keynes, MK7 6AA, United Kingdom

#### Table of Contents:

|                                                                                                                                                                                                                                                                                                                                                                                                                                                                                                                  |          |
|------------------------------------------------------------------------------------------------------------------------------------------------------------------------------------------------------------------------------------------------------------------------------------------------------------------------------------------------------------------------------------------------------------------------------------------------------------------------------------------------------------------|----------|
| <b>Figure S1:</b> Representative stacked <sup>1</sup> H NMR plots illustrating the resolved vinylic resonances for the methyl acrylate and (a) oxanorbornene (6.50 ppm) and (b) norbornene (6.28 ppm) end-groups for experiments reported in Figure 1, and Table 1, Entries 1 and 2. ....                                                                                                                                                                                                                        | Page 2   |
| <b>Table S1:</b> Details of polymers prepared via RAFT Polymerization.....                                                                                                                                                                                                                                                                                                                                                                                                                                       | Page 3   |
| <b>Figure S2:</b> Pseudo-first order kinetics plots (left) for conversion of monomer (red circles) and (oxa)norbornene end-group (black squares), and SEC chromatograms illustrating the evolution of the molar mass distribution with conversion (right) for polymerizations of MA (a, b), BA (c,d) and St (e,f) with the RAFT agents <b>7-ONb</b> (a,c,e) or <b>8-Nb</b> (b,d,f). Polymerizations of MA and BA performed with [M]:[RAFT] = 200:1; polymerizations of St performed with [M]:[RAFT] = 250:1..... | Page 4-5 |
| <b>Table S2:</b> Details of DP 50 targeted bottlebrush polymers prepared via ROMP.....                                                                                                                                                                                                                                                                                                                                                                                                                           | Page 6   |
| <b>Figure S2:</b> SEC chromatograms of macromonomers (black) and bottlebrush copolymers (blue) for polymerizations of (a) <b>PMA-7-ONb</b> , (b) <b>PMA-8-Nb</b> , (c) <b>PBA-7-ONb</b> , (d) <b>PBA-8-Nb</b> , (e) <b>PSt-7-ONb</b> , and (f) <b>PBA-8-Nb</b> . Polymerization were performed at: [Macromonomer]:[G3] = 50:1.....                                                                                                                                                                               | Page 6   |
| <b>References</b> .....                                                                                                                                                                                                                                                                                                                                                                                                                                                                                          | Page 7   |

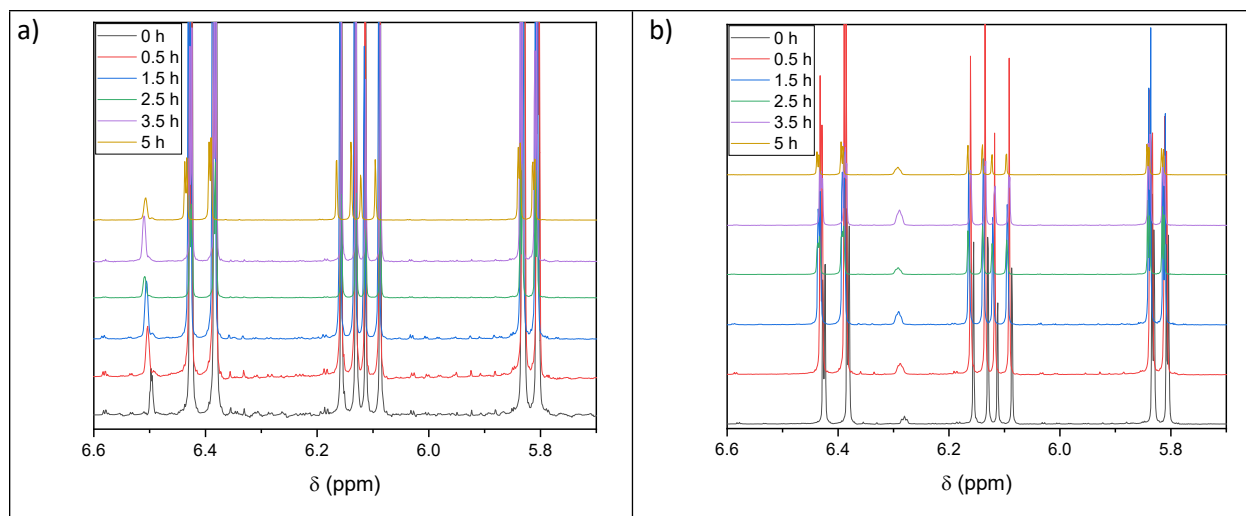

**Figure S1:** Representative stacked  $^1\text{H}$  NMR plots for illustrating the resolved vinylic resonances for the methyl acrylate and (a) oxanorbornene ( $\sim 6.50$  ppm) and (b) norbornene ( $\sim 6.28$  ppm) end-groups for experiments reported in Figure 1, and Table1, Entries 1 and 2.

**Table S1:** Details of polymers prepared via RAFT Polymerization

| Entry | monomer | $[M]_0$ (mol L <sup>-1</sup> ) | RAFT agent   | $T$ (°C) | $[M]_0:[RAFT]_0:[AIBN]_0$ | time (h) | M conv. (%) <sup>a</sup> | $M_n$ (calc) <sup>b</sup> | $M_n^c$ | $\bar{D}^c$ | L% (ω-end) <sup>d</sup> | DB% (NMR) <sup>a,e</sup> | DB % (SEC) <sup>e,f</sup> |
|-------|---------|--------------------------------|--------------|----------|---------------------------|----------|--------------------------|---------------------------|---------|-------------|-------------------------|--------------------------|---------------------------|
| 1     | MA      | 6.79                           | <b>7-ONb</b> | 60       | 200:1:0.1                 | 0.5      | 22                       | 3960                      | 5900    | 1.16        | 99.9                    | 9                        | 5.2                       |
|       |         |                                |              |          |                           | 1.5      | 51                       | 9320                      | 12500   | 1.24        | 99.6                    | 20                       | 17.6                      |
|       |         |                                |              |          |                           | 2.5      | 73                       | 13100                     | 18800   | 1.36        | 99.4                    | 31                       | 28.8                      |
|       |         |                                |              |          |                           | 3.5      | 81                       | 14500                     | 22500   | 1.50        | 99.2                    | 47                       | 37.8                      |
|       |         |                                |              |          |                           | 5        | 88                       | 15700                     | 25700   | 1.68        | 98.9                    | 62                       | 44.3                      |
| 2     | MA      | 6.79                           | <b>8-Nb</b>  | 60       | 200:1:0.1                 | 0.5      | 6                        | 1570                      | 1400    | 1.18        | 99.9                    | 1                        | 0                         |
|       |         |                                |              |          |                           | 1.5      | 39                       | 7260                      | 7900    | 1.12        | 99.6                    | 10                       | 2.6                       |
|       |         |                                |              |          |                           | 2.5      | 74                       | 13300                     | 15300   | 1.20        | 99.4                    | 17                       | 11.5                      |
|       |         |                                |              |          |                           | 3.5      | 82                       | 14700                     | 18000   | 1.23        | 99.2                    | 23                       | 13.7                      |
|       |         |                                |              |          |                           | 5        | 88                       | 15700                     | 19400   | 1.30        | 98.9                    | 26                       | 19.6                      |
| 3     | BA      | 4.68                           | <b>7-ONb</b> | 60       | 200:1:0.1                 | 0.5      | 32                       | 8740                      | 10100   | 1.24        | 99.9                    | 13                       | 5.8                       |
|       |         |                                |              |          |                           | 1.5      | 60                       | 15900                     | 20900   | 1.41        | 99.6                    | 27                       | 24.0                      |
|       |         |                                |              |          |                           | 2.5      | 73                       | 19300                     | 28100   | 1.46        | 99.4                    | 39                       | 33.4                      |
|       |         |                                |              |          |                           | 3.5      | 77                       | 20300                     | 32600   | 1.56        | 99.2                    | 42                       | 38.9                      |
|       |         |                                |              |          |                           | 4.5      | 82                       | 21600                     | 35900   | 1.67        | 99.0                    | 46                       | 43.4                      |
|       |         |                                |              |          |                           | 6        | 88                       | 23100                     | 37300   | 1.75        | 98.7                    | 51                       | 47.5                      |
| 4     | BA      | 4.68                           | <b>8-Nb</b>  | 60       | 200:1:0.1                 | 0.5      | 19                       | 5410                      | 5400    | 1.19        | 99.9                    | 6                        | 0                         |
|       |         |                                |              |          |                           | 1.5      | 55                       | 14600                     | 16400   | 1.17        | 99.6                    | 19                       | 6.2                       |
|       |         |                                |              |          |                           | 2.5      | 72                       | 19000                     | 21400   | 1.22        | 99.4                    | 21                       | 10.7                      |
|       |         |                                |              |          |                           | 3.5      | 79                       | 20800                     | 23700   | 1.27        | 99.2                    | 24                       | 14.5                      |
|       |         |                                |              |          |                           | 4.5      | 84                       | 22100                     | 26200   | 1.28        | 99.0                    | 27                       | 17.4                      |
|       |         |                                |              |          |                           | 6        | 89                       | 23400                     | 28200   | 1.32        | 98.7                    | 29                       | 20.6                      |
| 5     | St      | 8.73                           | <b>7-ONb</b> | 65       | 250:1:0.1                 | 2        | 3                        | 1300                      | 1900    | 1.20        | 99.1                    | 6                        | 0.7                       |
|       |         |                                |              |          |                           | 4        | 9                        | 2900                      | 3400    | 1.19        | 98.3                    | 9                        | 1.9                       |
|       |         |                                |              |          |                           | 7        | 16                       | 4700                      | 5600    | 1.22        | 97.4                    | 12                       | 7.4                       |
|       |         |                                |              |          |                           | 10       | 23                       | 6500                      | 7400    | 1.24        | 96.6                    | 16                       | 12.5                      |
|       |         |                                |              |          |                           | 22.5     | 39                       | 10700                     | 13800   | 1.43        | 94.7                    | 34                       | 31.1                      |
|       |         |                                |              |          |                           | 34       | 50                       | 13600                     | 18000   | 1.64        | 94.0                    | 39                       | 43.6                      |
| 6     | St      | 8.73                           | <b>8-Nb</b>  | 65       | 250:1:0.1                 | 2        | 4                        | 1580                      | 1900    | 1.18        | 99.1                    | 0                        | 1                         |
|       |         |                                |              |          |                           | 4        | 9                        | 2880                      | 3300    | 1.16        | 98.3                    | 0                        | 0                         |
|       |         |                                |              |          |                           | 7        | 17                       | 4970                      | 5300    | 1.12        | 97.4                    | 0                        | 0                         |
|       |         |                                |              |          |                           | 10       | 23                       | 6530                      | 6800    | 1.12        | 96.6                    | 1                        | 0                         |
|       |         |                                |              |          |                           | 22.5     | 43                       | 11700                     | 10900   | 1.12        | 94.7                    | 1                        | 0                         |
|       |         |                                |              |          |                           | 34       | 51                       | 13800                     | 12900   | 1.14        | 94.0                    | 1                        | 1.6                       |

<sup>a</sup>Calculated from <sup>1</sup>H NMR; <sup>b</sup> $M_n(\text{calc}) = ([M]_0 - [M]_t)/([RAFT]_0) \times MW_{\text{monomer}} + MW_{\text{RAFT}}$ ; <sup>c</sup>SEC THF eluent,  $T = 40^\circ\text{C}$  (data reported in polystyrene equivalents); <sup>d</sup> $L\% = ([CTA]_0/([CTA]_0 + df \times [I]_0 \times 1 - e^{-k_d t})) \times 100\%$ ,<sup>1-2</sup> where  $f$  is the initiator efficiency ( $= 0.7$ ),<sup>3</sup> $d$  is number of chains formed by radical-radical termination ( $= 1$ ),<sup>4</sup>and  $k_d = 9.67 \times 10^{-6} \text{ s}^{-1}$  at  $60^\circ\text{C}$  or  $k_d = 1.95 \times 10^{-5} \text{ s}^{-1}$  at  $65^\circ\text{C}$  (calculated from Arrhenius parameters)<sup>5</sup>; <sup>e</sup>DB% = percentage degree of branching; <sup>f</sup>calculated following deconvolution of SEC chromatograms.

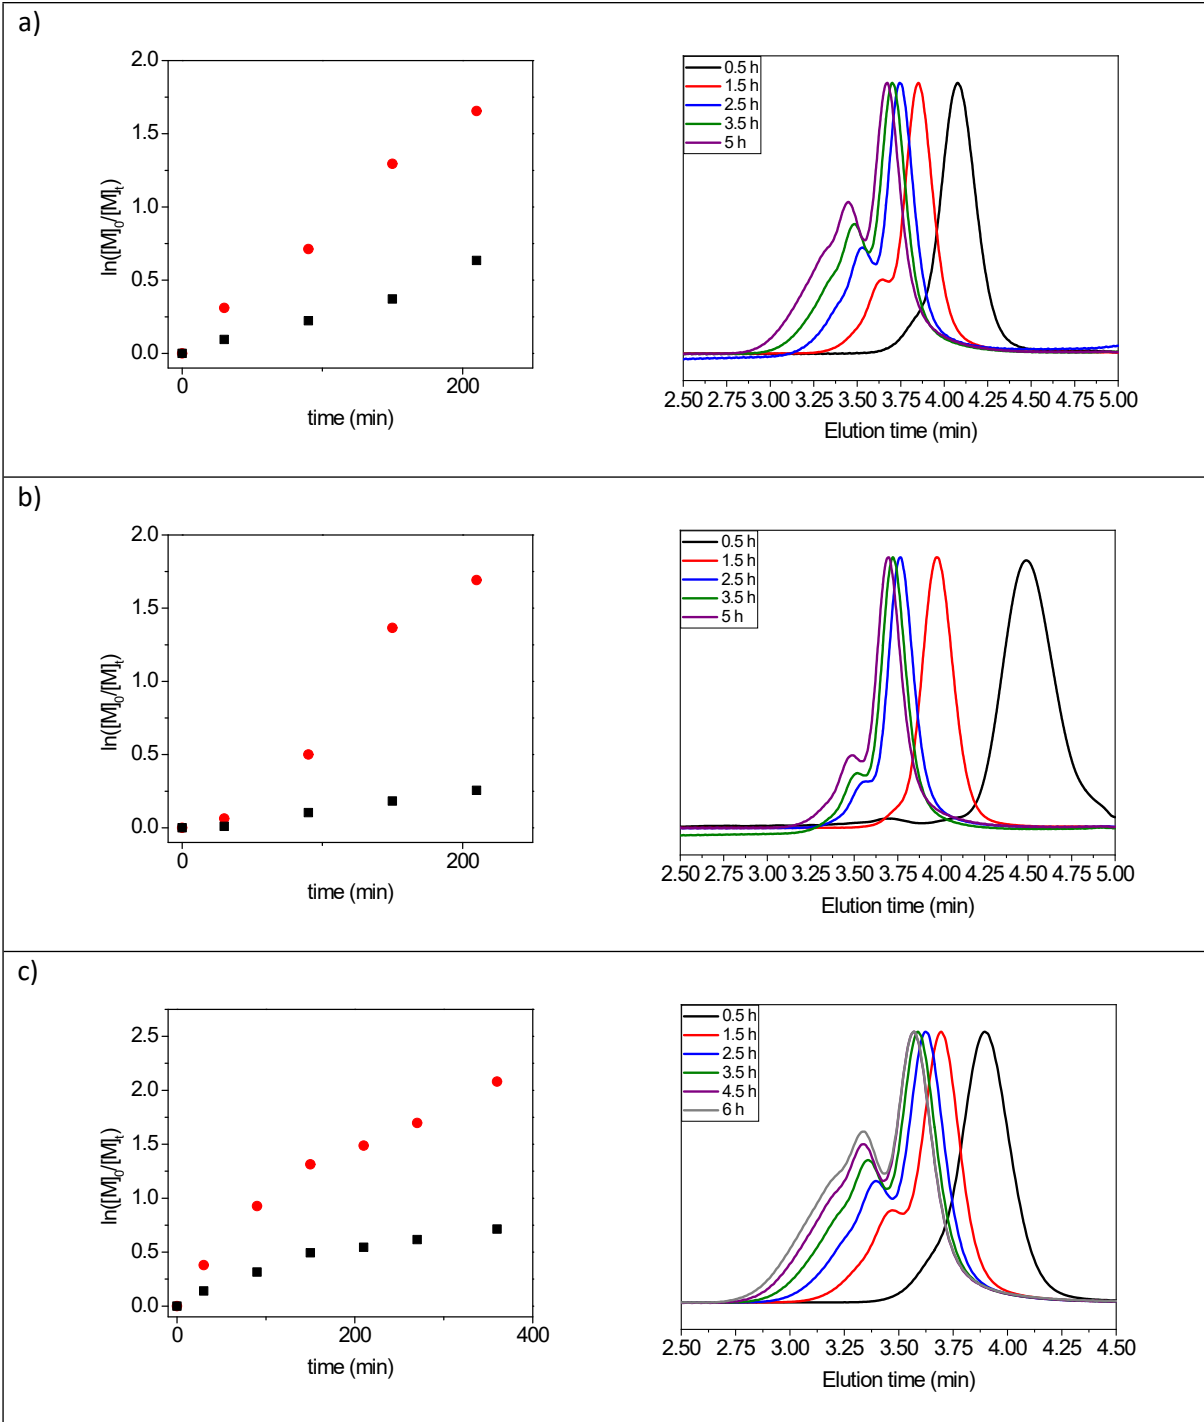

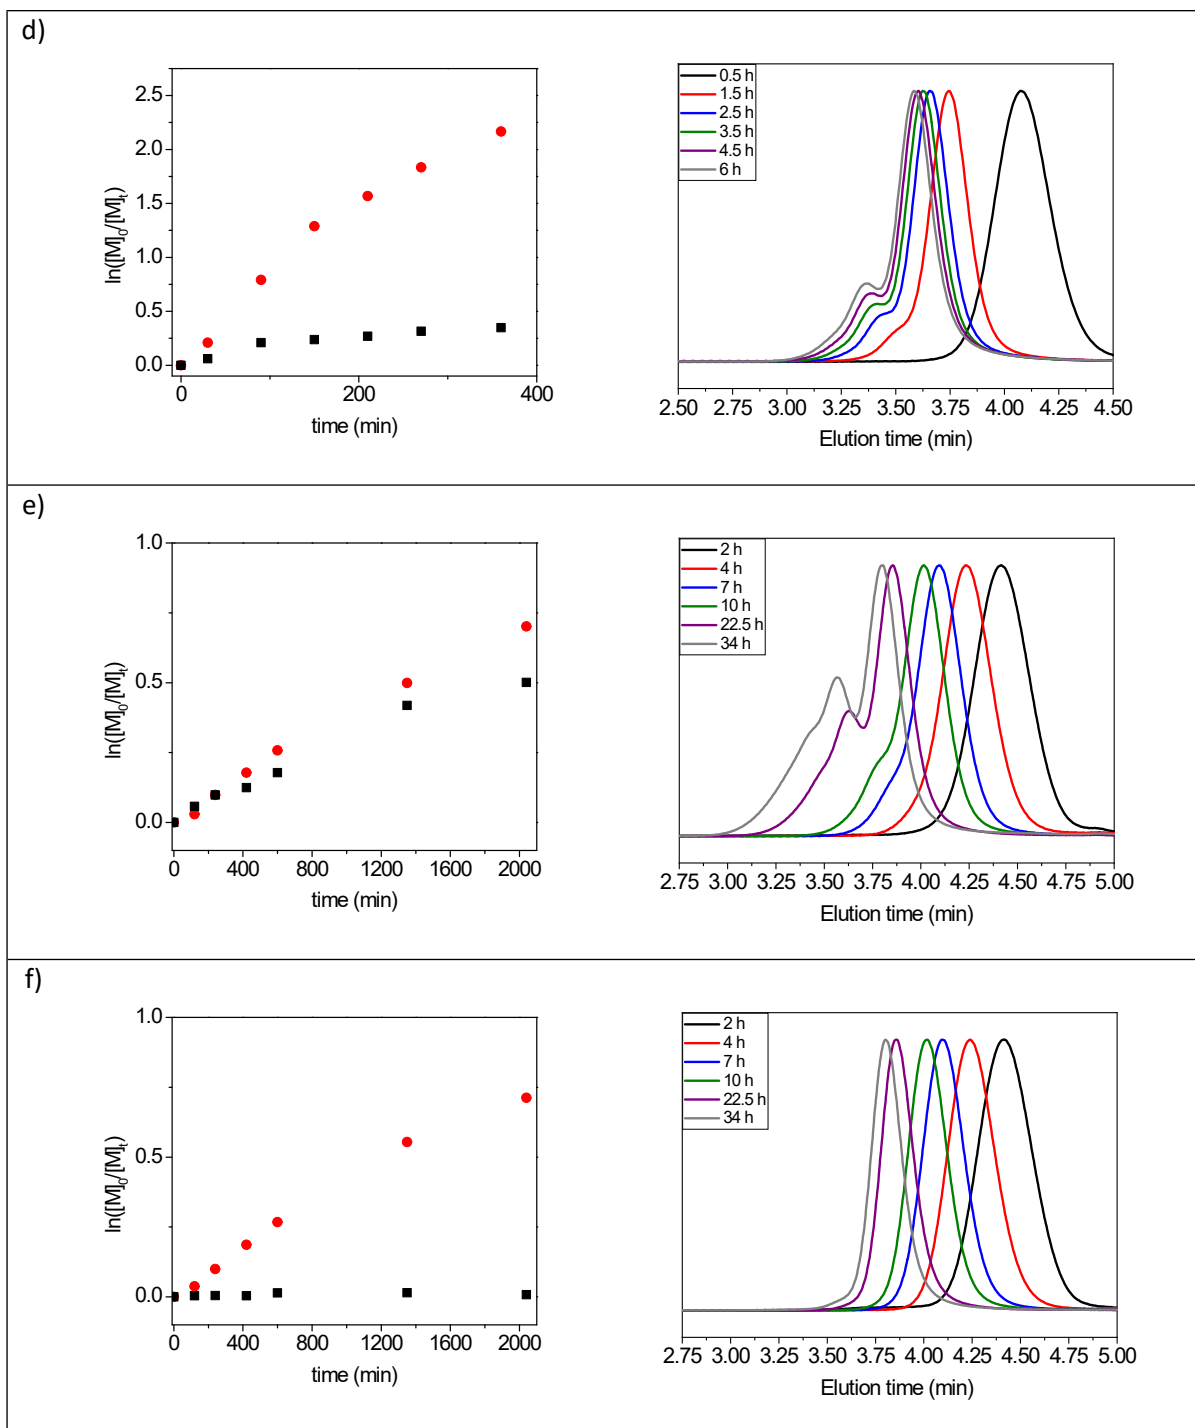

**Figure S2:** Pseudo-first order kinetics plots (left) for conversion of monomer (red circles) and (oxa)norbornene end-group (black squares), and SEC chromatograms illustrating the evolution of the molar mass distribution with reaction time (right) for polymerizations of MA (a, b), BA (c,d) and St (e,f) with the RAFT agents **7-ONb** (a,c,e) or **8-Nb** (b,d,f). Polymerizations of MA and BA performed with  $[M]:[RAFT] = 200:1$ ; polymerizations of St performed with  $[M]:[RAFT] = 250:1$ .

**Table S2:** Details of DP 50 targeted bottlebrush polymers prepared via ROMP

| Entry <sup>a</sup> | Macromonomer (MM) | MMM <sub>n</sub> (g mol <sup>-1</sup> ) <sup>b</sup> | Residual MM % | M <sub>n</sub> (GPC) (g mol <sup>-1</sup> ) <sup>c</sup> | Đ <sup>c</sup>     |
|--------------------|-------------------|------------------------------------------------------|---------------|----------------------------------------------------------|--------------------|
| 1                  | <b>PMA-7-ONb</b>  | 2700                                                 | 15            | >197000 <sup>d</sup>                                     | >1.49 <sup>d</sup> |
| 2                  | <b>PMA-8-Nb</b>   | 3100                                                 | 5             | 187000                                                   | 1.45               |
| 3                  | <b>PBA-7-ONb</b>  | 4300                                                 | 54            | >219000 <sup>d</sup>                                     | >1.36 <sup>d</sup> |
| 4                  | <b>PBA-8-Nb</b>   | 3200                                                 | 4             | 198000                                                   | 1.36               |
| 5                  | <b>PSt-7-ONb</b>  | 2900                                                 | 15            | 66000                                                    | 1.54               |
| 6                  | <b>PSt-8-Nb</b>   | 2800                                                 | 5             | >114000 <sup>d</sup>                                     | >1.77 <sup>d</sup> |

<sup>a</sup>[MM] = 0.33M in THF, [MM]/[G3]=50, t = 3 h, <sup>b</sup>Calculated from <sup>1</sup>H NMR; <sup>c</sup>From SEC THF eluent, T = 40°C (data reported in polystyrene equivalents); <sup>d</sup>peak truncated due to the sample reaching the exclusion limit of the SEC column

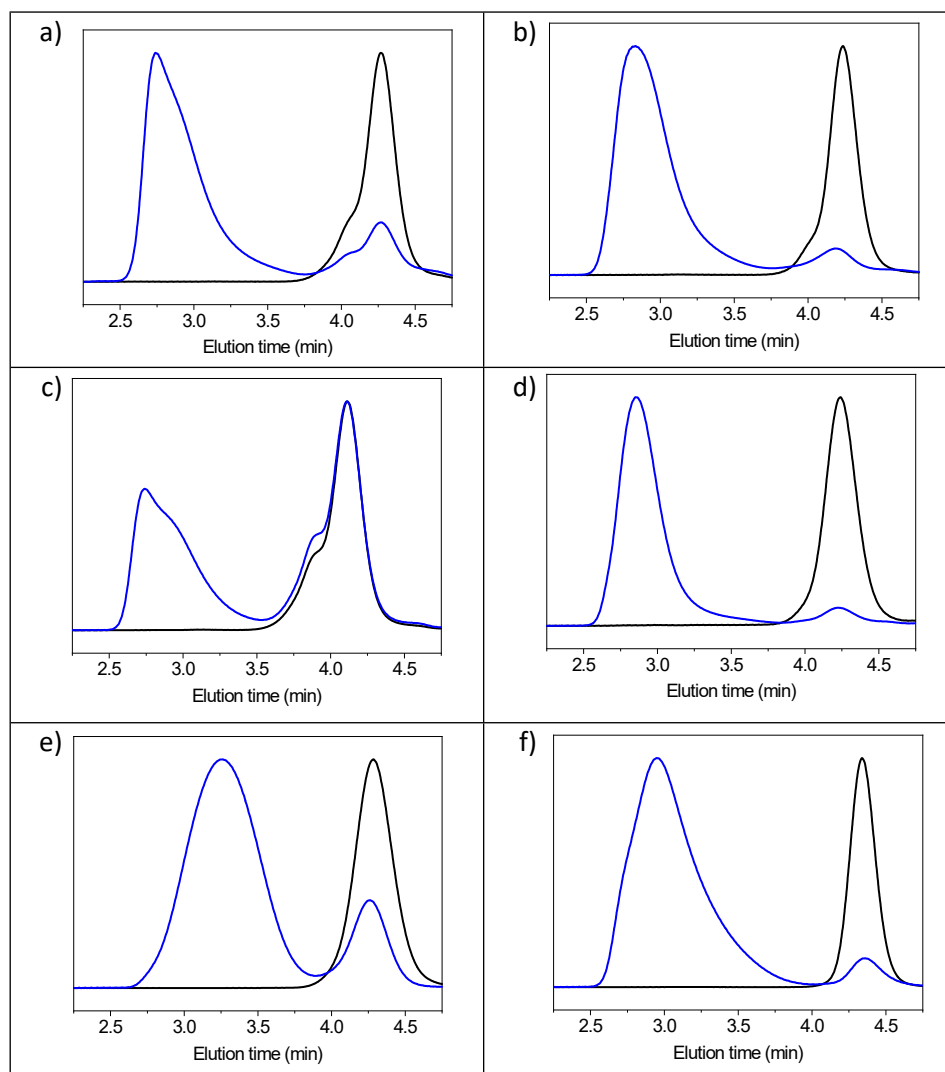

**Figure S3:** SEC chromatograms of macromonomers (black) and bottlebrush copolymers (blue) for polymerizations of (a) **PMA-7-ONb**, (b) **PMA-8-Nb**, (c) **PBA-7-ONb**, (d) **PBA-8-Nb**, (e) **PSt-7-ONb** and (f) **PBA-8-Nb**. Polymerization were performed at: [Macromonomer]:[G3] = 50:1.

## References

1. Gody, G.; Maschmeyer, T.; Zetterlund, P. B.; Perrier, S., Exploitation of the Degenerative Transfer Mechanism in RAFT Polymerization for Synthesis of Polymer of High Livingness at Full Monomer Conversion. *Macromolecules* **2014**, *47* (2), 639-649.
2. Gardiner, J.; Martinez-Botella, I.; Tsanaktsidis, J.; Moad, G., Dithiocarbamate RAFT agents with broad applicability - the 3,5-dimethyl-1H-pyrazole-1-carbodithioates. *Polym. Chem.* **2015**.
3. Houshyar, S.; Keddie, D.; Moad, G.; Mulder, R.; Saubern, S.; Tsanaktsidis, J., The Scope for Synthesis of Macro-RAFT Agents by Sequential Insertion of Single Monomer Units. *Polymer Chemistry* **2011**, *Published as an Online Article*, DOI: 10.1039/C2PY00529H
4. Moad, G.; Solomon, D. H., 5 - Termination. In *The Chemistry of Radical Polymerization (Second Edition)*, Elsevier Science Ltd: Amsterdam, 2005; pp 233-278.
5. Moad, G.; Solomon, D. H., 3 - Initiation. In *The Chemistry of Radical Polymerization (Second Edition)*, Elsevier Science Ltd: Amsterdam, 2005; pp 49-166.
